# Supplementary material
Source: PubMed Central journal article supplement (PMC6544150)
Supplement: NIHMS1522653-supplement-6.pdf [file NIHMS1522653-supplement-6.pdf]

Mus musculus PRDM9 SET Domain—AA 191-376 (Dom2 allele)

Wild-Type

AAGGGCCTTGCCTATGAGGAGGTCAGCGAGCCTCAGGATGATGACTATCTCTATT  
GTGAGAAGTGCCAGAATTTCTTCATCGACAGTTGTCCCAACCATGGGCCTCCTTTA  
TTTGTA AAAAGACAGTATGGTGGACAGGGGGCATCCCAACCACTCAGTCCTCAGTCT  
GCCCCCTGGGCTAAGAATTAGTCCATCGGGCATCCCTGAAGCTGGACTTGGAGTA  
TGGAATGAAGCATCTGATCTACCAGTCGGTCTGCACTTTGGCCCCTATGAGGGTCA  
GATCACAGAGGATGAAGAGGCAGCCAACAGTGGTTACTCCTGGCTGATTACCAAG  
GGAAGAAACTGCTATGAGTATGTGGATGGACAGGACGAGTCCCAAGCCA ACTGGA  
TGAGGTATGTGAACTGTGCCCGGGATGATGAAGAGCAGAACCTGGTAGCCTTTCA  
ATATCACAGGAAAATCTTCTATCGAACCTGCCGGGTTATCAGACCAGGTTGTGAGC  
TTCTGGTCTGGTATGGGGAT **GAG** TACGGCCAGGAACTGGGCATTAAGTGGGGAAG  
CAAG

Protein:

KGLAYEEVSEPQDDDYLYCEKCQNFFIDSCPNHGPPLFVKDSMVD RGHPNH SVLSLP  
PGLRISPSGIPEAGLG V WNEASDLPVGLHFGPYEGQITEDEEAANS GYSWLITKGRNC  
YEYVDGQDESQANWMRYVNCARDDEEQNLVAFQYHRKIFYR TCRVIRPGCELLVWY  
GDE **E** YGQELGIKWGSK

Prdm9<sup>E365K</sup> (abbreviated as EK)

Glu 365 -> Lys; GAG -> AAG

AAGGGCCTTGCCTATGAGGAGGTCAGCGAGCCTCAGGATGATGACTATCTCTATT  
GTGAGAAGTGCCAGAATTTCTTCATCGACAGTTGTCCCAACCATGGGCCTCCTTTA  
TTTGTA AAAAGACAGTATGGTGGACAGGGGGCATCCCAACCACTCAGTCCTCAGTCT  
GCCCCCTGGGCTAAGAATTAGTCCATCGGGCATCCCTGAAGCTGGACTTGGAGTA  
TGGAATGAAGCATCTGATCTACCAGTCGGTCTGCACTTTGGCCCCTATGAGGGTCA  
GATCACAGAGGATGAAGAGGCAGCCAACAGTGGTTACTCCTGGCTGATTACCAAG  
GGAAGAAACTGCTATGAGTATGTGGATGGACAGGACGAGTCCCAAGCCA ACTGGA  
TGAGGTATGTGAACTGTGCCCGGGATGATGAAGAGCAGAACCTGGTAGCCTTTCA  
ATATCACAGGAAAATCTTCTATCGAACCTGCCGGGTTATCAGACCAGGTTGTGAGC  
TTCTGGTCTGGTATGGGGAT **AAG** TACGGCCAGGAACTGGGCATTAAGTGGGGAAG  
CAAG

Protein:

KGLAYEEVSEPQDDDYLYCEKCQNFFIDSCPNHGPPLFVKDSMVD RGHPNH SVLSLP  
PGLRISPSGIPEAGLG V WNEASDLPVGLHFGPYEGQITEDEEAANS GYSWLITKGRNC

YEYVDGQDESQANWMRYVNCARDDEEQNLVAFQYHRKIFYRTCRVIRPGCELLVWY  
GDKYGQELGIKWGSK
